# Supplementary material for: A boron nitride–carbon composite derived from ammonia borane and ZIF-8 with promises for the adsorption of carbon dioxide
Source: Royal Society of Chemistry journal article supplement (doi:10.1039/d4nj00643g), 2024-01-01
Supplement: d4nj00643g1.pdf [file d4nj00643g1.pdf]

## Supplementary Information

### **A boron nitride – carbon composite derived from ammonia borane and ZIF-8 with promises for the adsorption of carbon dioxide**

Carlos A. Castilla-Martinez,<sup>a,\*</sup> Christophe Charmette,<sup>a</sup> Jim Cartier,<sup>a</sup> and Umit B. Demirci<sup>a</sup>

<sup>a</sup> *Institut Européen des Membranes, IEM – UMR 5635, Univ Montpellier, ENSCM, CNRS, Montpellier, France*

*\*Corresponding author:*

*ccastilla90@gmail.com; carlos.castilla-martinez@umontpellier.fr*

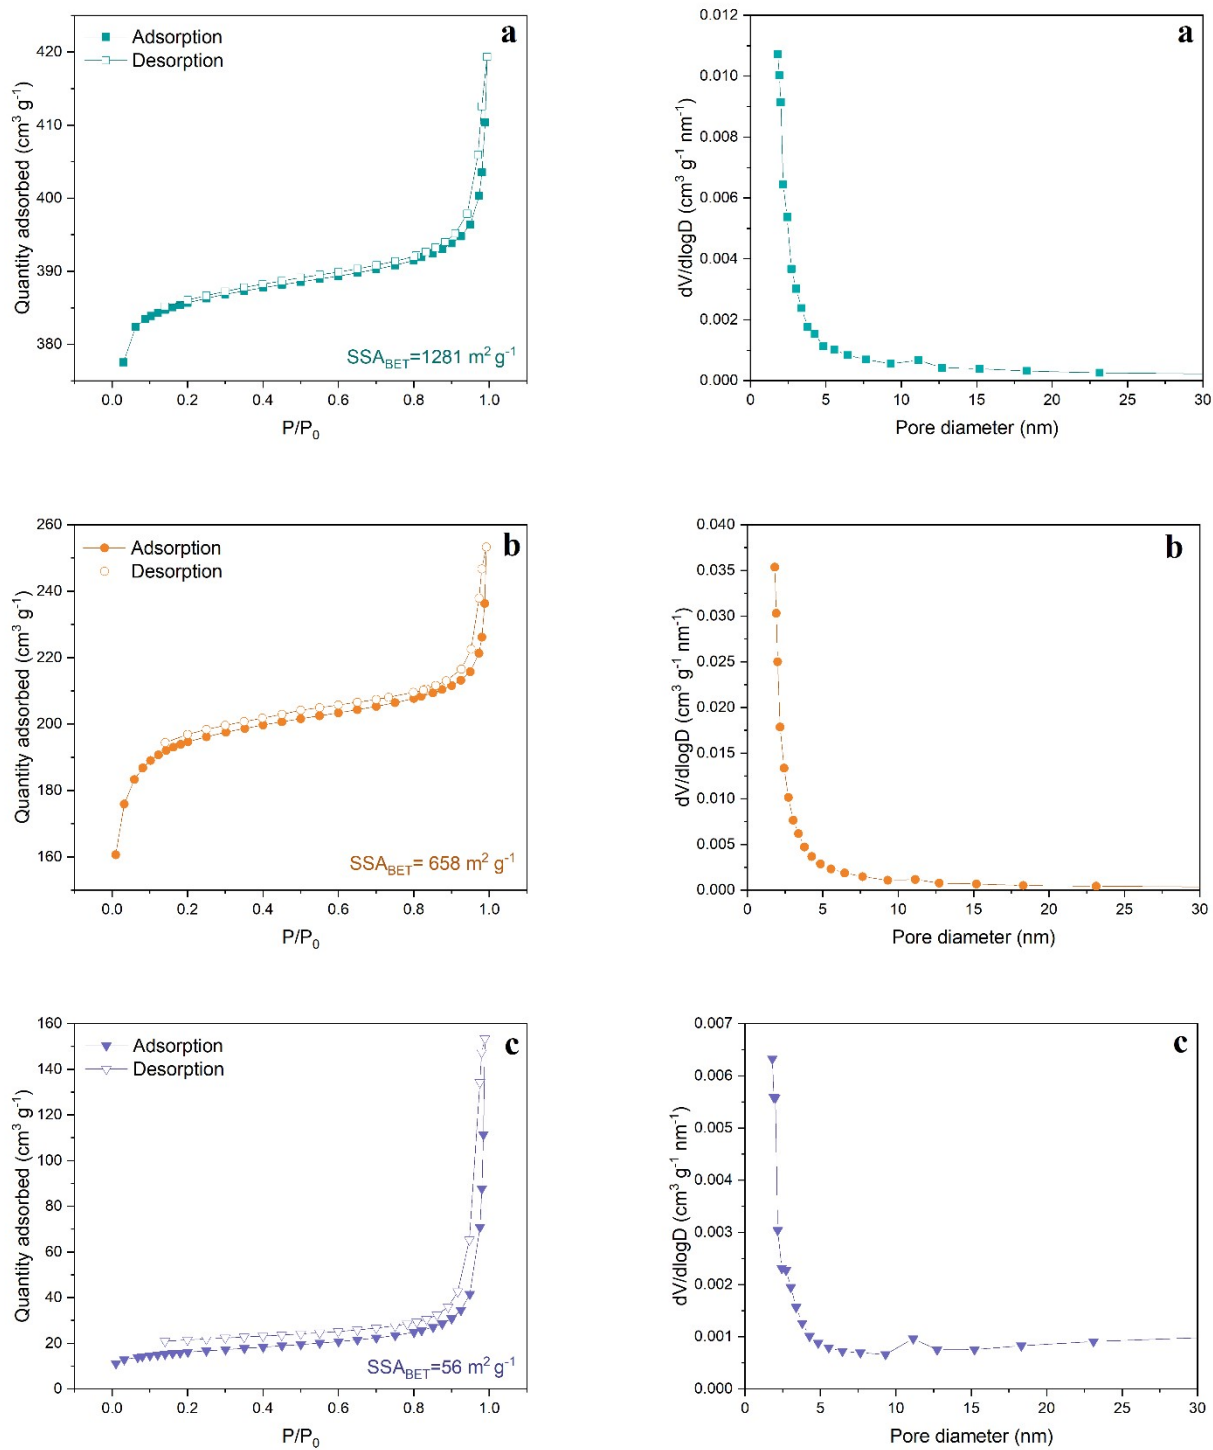

**Figure S1.**  $N_2$  sorption isotherms (left) and average pore size distribution (right) of: **a** pristine ZIF-8, **b** ZIF800 and **c** BN@ZIF. The specific surface area SSA of each material is given.

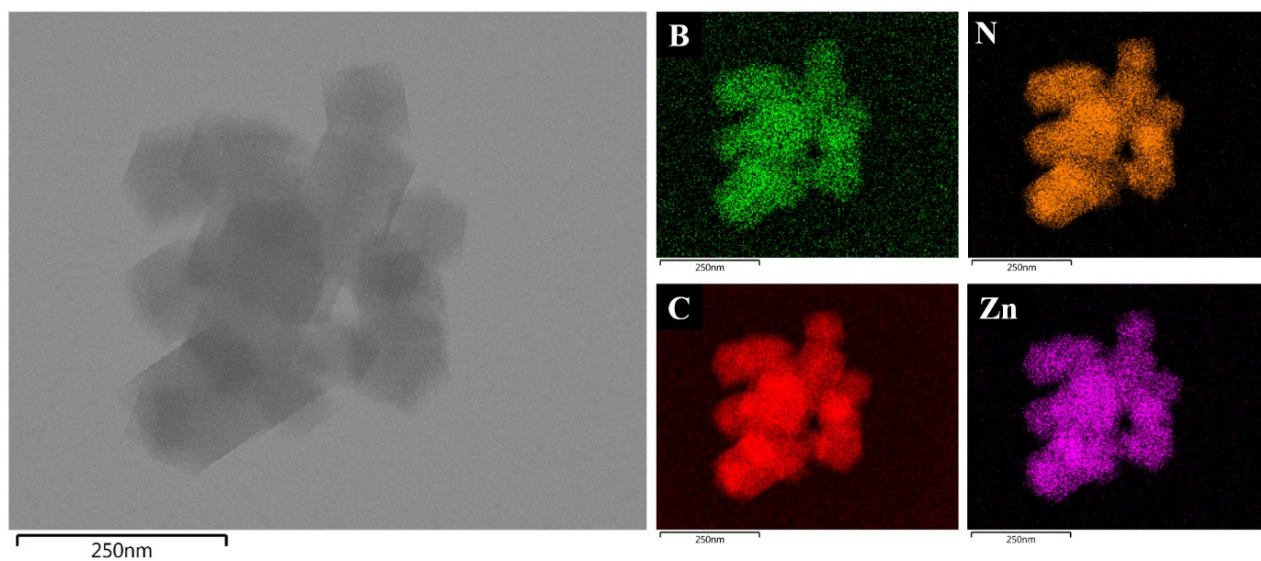

**Figure S2.** STEM-EDX analysis of the BN@ZIF composite. A homogeneous distribution of the B and N atoms is observed.

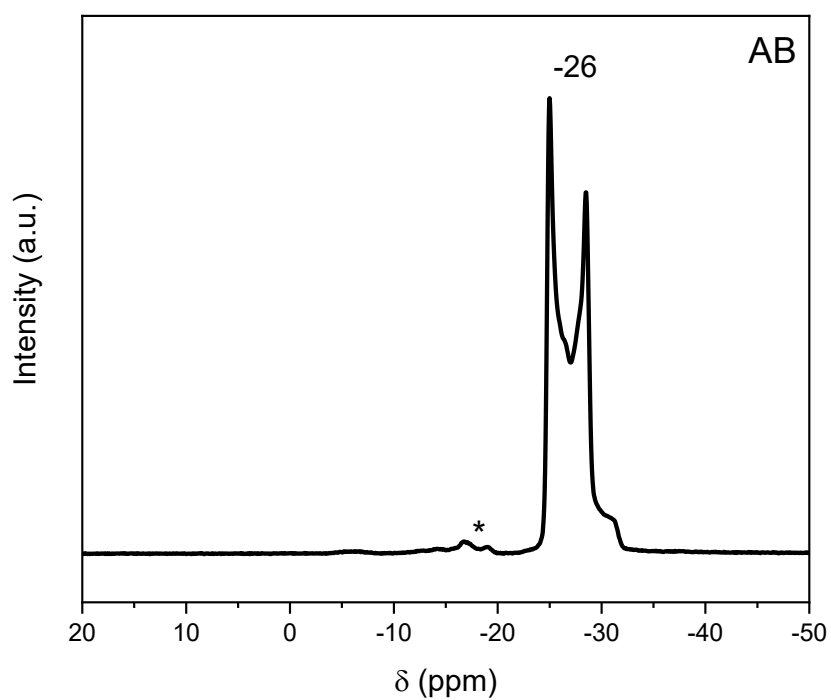

**Figure S3.**  $^{11}\text{B}$  MAS NMR spectrum of AB. The chemical shift in ppm is indicated. The signals pointed by the star (\*) indicate a slight decomposition of AB due to a possible increase of

temperature caused by the rotor rotation during the analysis. This is an issue that we have seen systematically.

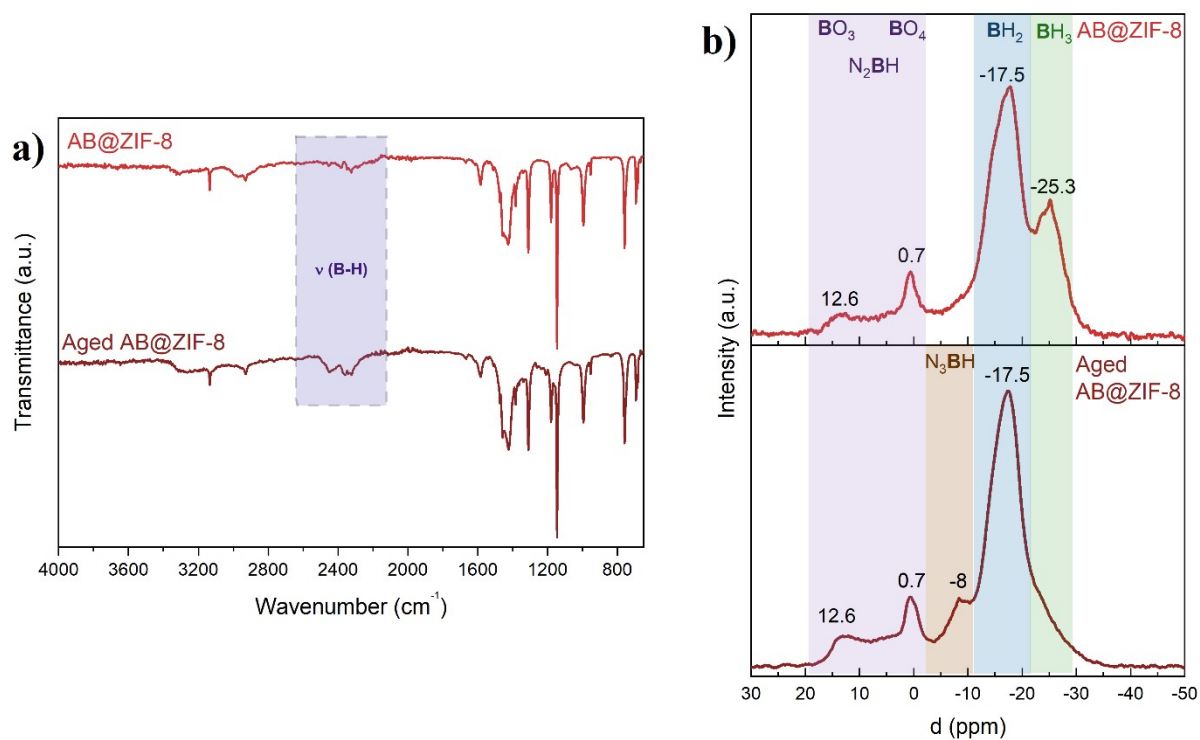

**Figure S4.** a) FTIR and b) <sup>11</sup>B MAS NMR spectra of the AB@ZIF-8 composite and an aged sample for 7 months. The vibrational modes and chemical environments of interest are indicated by the colored rectangles. The chemical shifts are indicated.

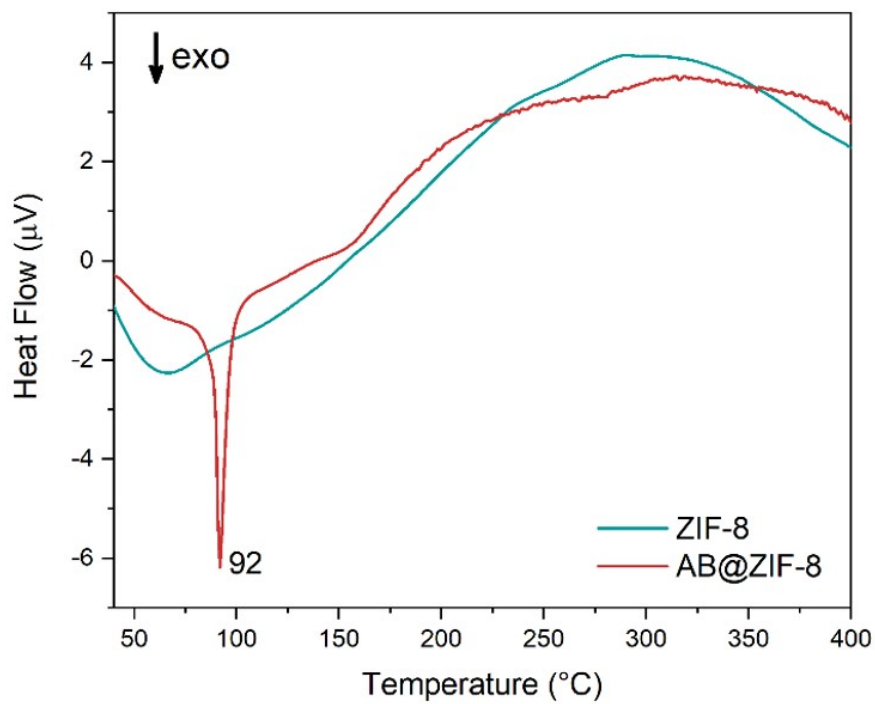

**Figure S5.** DSC analysis of pristine ZIF-8 and AB@ZIF-8.

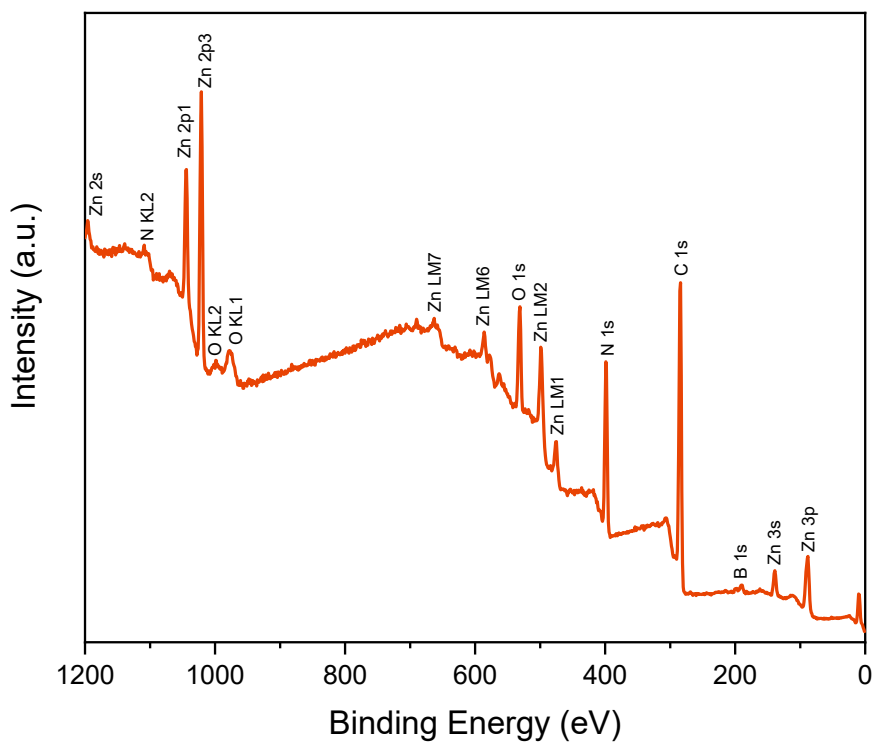

**Figure S6.** XPS survey spectrum of the AB@ZIF-8 composite.

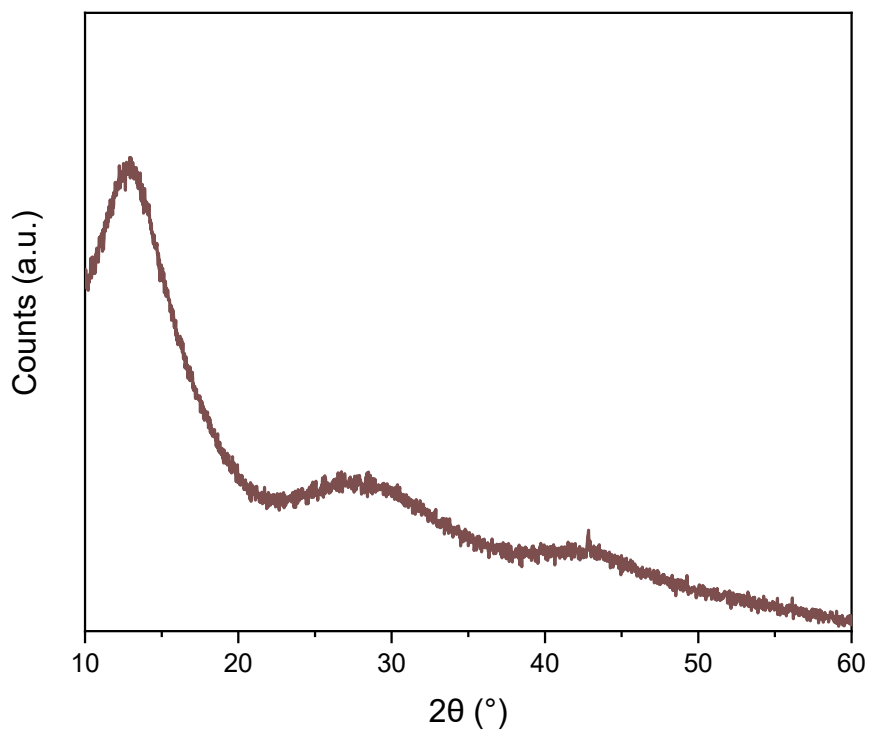

**Figure S7.** PXRD pattern of the BN@ZIF composite. A small diffraction peak is observed at 42° and it can be attributed to the formation of h-BN.

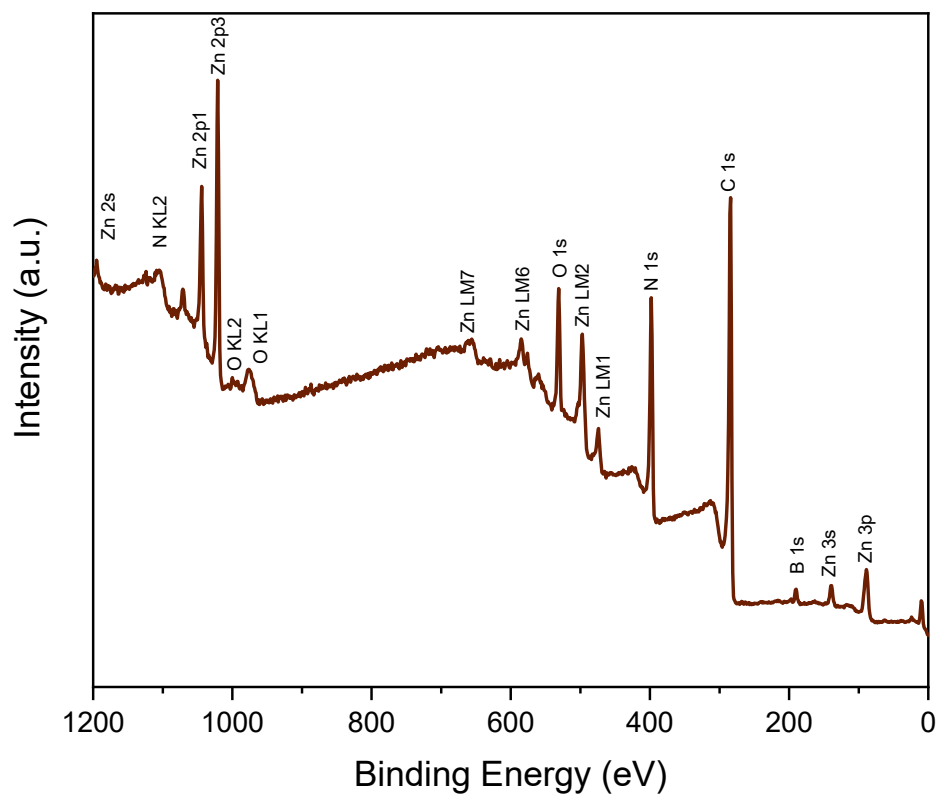

**Figure S8.** XPS survey spectrum of the BN@C composite.

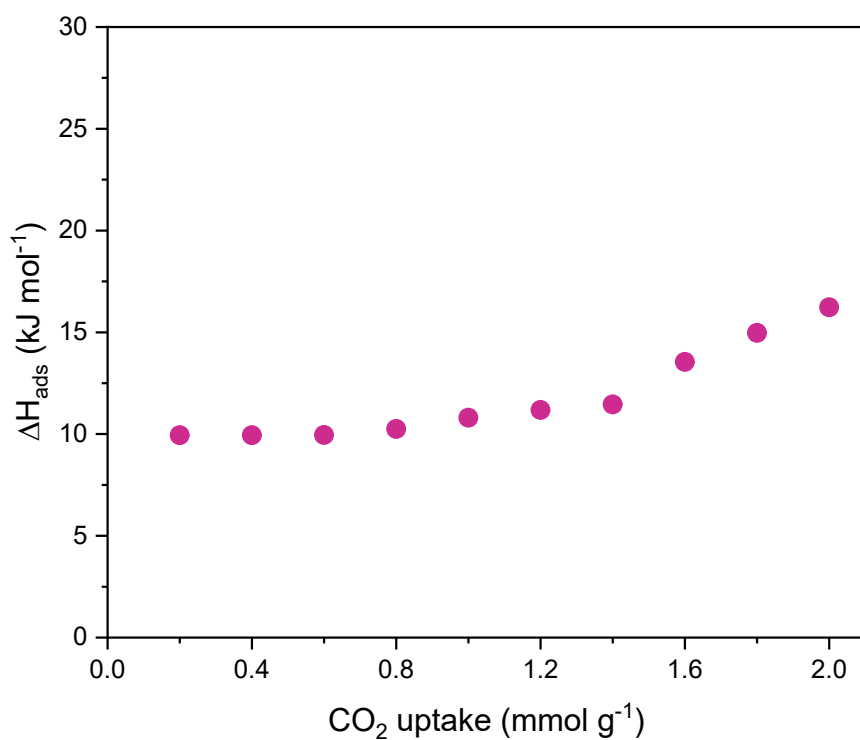

**Figure S9.** Isosteric enthalpy of adsorption of BN@C as a function of the CO<sub>2</sub> adsorbed.

**Table S1.** CO<sub>2</sub> uptake capacity of BN@C at different conditions

| Temperature (°C) | Pressure (bar) | CO <sub>2</sub> uptake (mmol g <sup>-1</sup> ) |
|------------------|----------------|------------------------------------------------|
| 10               | 1.5            | 2.26                                           |
|                  | 2.5            | 2.9                                            |
| 30               | 1.5            | 1.94                                           |
|                  | 2.5            | 2.36                                           |
| 45               | 1.5            | 1.48                                           |
|                  | 2.5            | 2.11                                           |
